# Supplementary material
Source: Elsevier journal article supplement (https://www.sciencedirect.com/science/article/pii/S0025775320308265)
Supplement: mmc1 [file S0025775320308265:mmc1.doc]

**ANEXO 1: TABLA STROBE DE VERIFICACIÓN**

| **TABLA STROBE DE VERIFICACIÓN** | |
| --- | --- |
| Epígrafe | Localización (en cada epígrafe): Comentarios (si procede) |
| Título y resumen | |
| 1a - Título | Inicio del artículo |
| 1b - Resumen | Situado tras la enumeración de autores y sus afiliaciones |
| Introducción | |
| 2 – Contexto. Fundamentos científicos | Párrafos 1 a 5: Se recorta la introducción según solicitud editorial. |
| 3 - Objetivos | Párrafo 6 |
| Métodos | |
| 4 – Diseño del estudio | Párrafo 1 |
| 5 - Contexto | Párrafo 8 |
| 6 - Participantes | Párrafos 1, 2 y 3 |
| 7 - Variables | Párrafos 5 y 6 |
| 8 - Fuentes de datos / medidas | Fuente de datos- Párrafo 5  Medida- Párrafos 6 y 7 y Tabla 1 |
| 9 - Sesgos | Párrafo 8 |
| 10 - Tamaño muestral | No se ha estimado el tamaño muestral puesto que la distribución de la variable IL-6 no es normal y la variable puntuación GDS no es continua. |
| 11 - Variables cuantitativas | Párrafo 5 |
| 12 - Métodos estadísticos | Párrafo 9 |
| Resultados | |
| 13 - Participantes | Párrafo 1 |
| 14 – Datos descriptivos | Párrafos 2 y 3. Tabla 2 |
| 15 – Datos de las variables | Párrafos 3 y 4. Tabla 2 |
| 16 – Resultados principales | Párrafo 5 |
| 17 - Otros análisis | Párrafo 6. Figura 1 |
| Discusión | |
| 18 - Resultados clave | Epígrafe Conclusiones. Párrafos 1 y 2. |
| 19 - Limitaciones | Párrafo 1 |
| 20 - Interpretación | Párrafos 2, 3 y 4 |
| 21 - Generalización | Párrafo 1 |
| Otra Información | |
| 22 - Financiación | Ninguna |
